# Supplementary material for: Comparative description and ossification patterns of Dendropsophus labialis (Peters, 1863) and Scinax ruber (Laurenti, 1758) (Anura: Hylidae)
Source: PeerJ. 2018 Jun 6;6:e4525. doi: 10.7717/peerj.4525 (PMC5994159; doi:10.7717/peerj.4525)
Supplement: Supplemental Information 1 — Y, yes; N, not. [file peerj-06-4525-s001.xlsx]

## Sheet: Hoja1
Subfamily		Acridinae	Cophomantinae			Dendropsophinae				Hylinae		Scinaxinae
Group			Boana pulchella	Hyla albopuntacta		Dendropsophus labialis	Microcephala					Scinax rostratus					Scinax uruguayus		Scinax catharinae																		Scinax ruber
Specie		Acris crepitans	Boana			Dendropsophus				Dryophytes versicolor	Hyla orientalis	Julianus							Ololygon						Scinax
			Boana pulchella	Boana raniceps	Boana lanciformis	D. labialis	D. nanus					J. acuminatus					J. uruguayus	J. aff. pinimus	O. aromothyella		O. berthae			O. skuki	S. squalirostris		S. boulengeri		S. fuscovarius			S. nasicus				S. granulatus		S. ruber
Reference		Maglia et al. 2007	Hoyos et al. 2012	Alcalde and Rosset 2003		This study	Fabrezi and Lavilla 1992	Alcalde and Rosset 2003	Vera Candioti et al. 2004	Sheil et al. 2014	Yıldırım and Kaya 2014	Fabrezi and Lavilla 1992	Faivovich 2002	Alcalde and Rosset 2003	Alcalde et al. 2011	Rodrigues et al. 2017	Alcalde et al. 2011 and Rodrigues et al. 2017		Alcalde et al. 2011	Rodrigues et al. 2017	Rodrigues et al. 2017	Alcalde et al. 2011	Faivovich 2002	Rodrigues et al. 2017	Rodrigues et al. 2017	Alcalde and Rosset 2003	Vera and Haas 2007	Rodrigues et al. 2017	Fabrezi and Vera 1997	Alcalde and Rosset 2003	Rodrigues et al. 2017	Alcalde and Rosset 2003	Vera Candioti et al. 2004	Rodrigues et al. 2017	Vera and Haas 2007	Alcalde and Rosset 2003	Rodrigues et al. 2017	Haas1996	This study
Stage	Tadpole			Y	Y	Y		Y	Y	Y	Y			Y	Y	Y	Y	Y	Y	Y	Y	Y	Y	Y	Y	Y	Y	Y	Y	Y	Y	Y	Y	Y	Y	Y	Y	Y	Y
	Posmetamorph	Y				Y																																Y	Y
	Adult	Y	Y								Y	Y	Y
Elements	Cranium	Y	Y	Y	Y	Y		Y	Y	Y	Y	Y	Y	Y	Y	Y	Y	Y	Y	Y	Y	Y	Y	Y	Y	Y	Y	Y	Y	Y	Y	Y	Y	Y	Y	Y	Y	Y	Y
	Postcranium		Y			Y					Y		Y							Y																			Y
Cranium	Pattern of miniaturization	Y	N	N	N	N	N	N	N	N	N		N	N	N	N	N	N	N	N	N	N	N	N	N	N	N	N	N	N	N		N	N	N	N	N	N	N
	Skull is poorly ossified	Y	N	N	N	N	N	N	N	N	N		N	N	N	N	N	N	N	N	N	N	N	N	N	N	N	N	N	N	N	N	N	N	N	N	N	N	Y
	Foraminas in the skull are clearly visualized			Y	Y	Y								Y												Y				Y		Y				Y			N
	Presence of two fenestrae parietale					N														Y	Y	Y		N				Y									Y		N
	The cranial floor is open			Y	N	N								N												Y				Y		N				N			N
	Cranial cartilages are heavily mineralized	Y	N	N	N	N	N	N	N	N	N		N	N	N	N	N	N	N	N	N	N	N	N	N	N	N	Y	N	N	N		N	N	N	N	Y	N	Y
	Chondrocranium is nearly as long as wide			Y	Y	Y																				Y										Y			Y
	Median prenasal cartilage is present					N					N																												N
	Nasal bones are fused to endochondral ossification of the tectum nasi	Y				N																																	N
	Palatines are reduced	Y				N																																	N
	Neopalatine is present					N					N																												N
	Larval otic process is present					Y					Y																												Y
	The otic process is composed of an anterior, inferior and horizontal part, an abruptly ascending middle part and a posterior, superior and horizontal part			Y		Y	Y					Y														Y				Y						Y			Y
	Prootics and exoccipitals are not fused to one another (although the prootics are well-developed and ornamented).	Y	N			N																																	N
	The lateral development of the crista parotica is prominent					Y																																	N
	Cranial square commissure shows with half the width of the muscular process at its base			Y	Y	N																																	N
	Dorsomedial process is ... than the ventromedial process					Wide																																	Narrow
	Suprarrostral cartilage with corpus and alae forming a continuous structure					Y		Y																															N
	Trabecular horns are …			long		short and narrow											short and widely divergent free portions									short				short									longer
	The lateral process of the trabecular horns is lacking			Y		Y																																	Y
	Regular distal end of the cornua trabeculae					Y														Y		Y		N				Y									Y		Y
	Distal side of the cornu trabeculae extends posteriorly toward the otic capsule and the anterior region of the palatoquadrate is …					Broad																																	Narrow
	Processus ascendens of the palatoquadrate is wide					Y																																	N
	Presence of admandibular cartilage					N																																	N
	Presence of adostral cartilage			N	N	N																				N										N			N
	Planum ethmoidale is …					Narrow																																	Wide
	Good development of the square ethmoidal process			Y		Y																																	Y
	Sinus posterior hypobranchialis and the processus quadrato-ethmoidale are missing.			Y		N		Y																															N
	Alae and corpus of suprarostral cartilage have deeper notches					Y																					Y								Y				Y
	The suprarostral body exhibits a wide dorsomedial notch and is fused dorsally to the alas					N																							Y										N
	Presence of a sindesmotic connection between corpus and ala of the cartilago suprarostrale			Y	N	Y							Y													N						N			Y	N			Y
	Tripartite cartilago suprarostralis					Y													Y																				Y
	Corpus and ala of suprarostral fused					N														Y		Y		N				Y									Y		N
	Plectral apparatus develop during metamorphosis					N					Y																												N
	Presence of tectum parietale					Y										Y	Y	Y						N															Y
	Syndesmotic connection between body and alas of the suprarrostral cartilage					Y								Y												Y				Y									Y
	The level of juxtaposition of the inner margins of frontoparietal bones being two extremes continuum					N							Y																										N
	Robust jaw cartilages					N											Y	Y																					N
	Processus muscularis thin and directed anteriorly					N											Y																						Y
	Processus anterolateralis is straight					N												Y																					N
	Non-colored spurs behind the lower jaw sheath					N													Y																				Y
	Processus articularis is …					distinguishable											short and wide		long and thin			long and thin												Long medially					Wide
	Pars articularis quadrati width = length					N										Y								N							Y			Y					Y
	Pars reuniens is ... shape			V	V	rectangular																																	rectangular
	Presence of a process lateral to the ceratohyals condilus articularis		N	N	N	N		N						Y												Y				Y		Y				Y			Y
	Medially curved processus anterolateralis hyalis of the ceratohyalia					Y																		Y	N														Y
	Each ceratobranchial has its own spicule			except ceratohyal IV		except ceratohyal IV					Y															except ceratohyal IV										except ceratohyal IV			except ceratohyal IV
	Reduction of the buccopharyngeal and branchial basket structures	Y				N			Y																														N
	Proximal ends of all ceratobranchials fused to hypobranchial plate					Y					Y																												Y
	Ceratohyalia II-IV fused					N																																Y	Y
	Copula I present			Y	N	Y								Y												N				Y		Y				N			N
	Copula II present				Y	Y																														Y			Y
Poscranium	Presence of a process in the suprascapula	Y	Y		Y	Y													N	N	N	N	N	N															Y
	Vertebra do not fuse with one another					Y					Y																												Y
	Presence of intercalary element					N					Y																												N
	Phalanges are present in the forelimb when metacarpal IV, V and III are differentiated					Y					Y																												Y
	Coracoid ridge present					Y							Y																										Y
	Distal phalanx expanded					Y							Y																										Y
Ossification sequence	Present in the paper	N	Y	N	N	Y	N	N	N	Y	Y	N	N	N	N	N	N	N	N	N	N	N	N	N	N	N	N	N	N	N	N	N	N	N	N	N	N	Y	Y
	Intraspecific variation in both cranial and postcranial	N	Y	N	N	Y	N	N	N	N	N	N	N	N	N	N	N	N	N	N	N	N	N	N	N	N	N	N	N	N	N	N	N	N	N	N	N	N	Y
